# Supplementary material for: Calcium-chelating alizarin and other anthraquinones inhibit biofilm formation and the hemolytic activity of Staphylococcus aureus
Source: PubMed Central journal article supplement (PMC4725881; doi:10.1038/srep19267), 2016-01-14
Supplement: srep19267-s1.pdf [file srep19267-s1.pdf]

## Supplementary Information

### **Calcium-chelating alizarin and anthraquinones inhibit biofilm formation and the hemolytic activity of *Staphylococcus aureus***

Jin-Hyung Lee<sup>1\*</sup>, Yong-Guy Kim<sup>1\*</sup>, Shi Yong Ryu<sup>2</sup>, and Jintae Lee<sup>1†</sup>

<sup>1</sup>*School of Chemical Engineering, Yeungnam University, Gyeongsan, 712-749, Republic of Korea*

<sup>2</sup>*Korea Research Institute of Chemical Technology, Daejeon, 305-606, Republic of Korea*

**Supplementary Figure S1.** Histogram of *S. aureus* biofilm formation in the presence of each of the 560 phytochemicals. Biofilm screening for *S. aureus* MSSA 6538 was performed at a concentration of 10  $\mu\text{g/ml}$  in 96-well plates after culture for 24 h. Numbers on the right indicate numbers of phytochemicals. Biofilm formation (%) on the Y-axis represents changes in biofilm formation, that is, biofilm formation in the presence of a phytochemical is expressed as a percentage of biofilm formation in its absence.

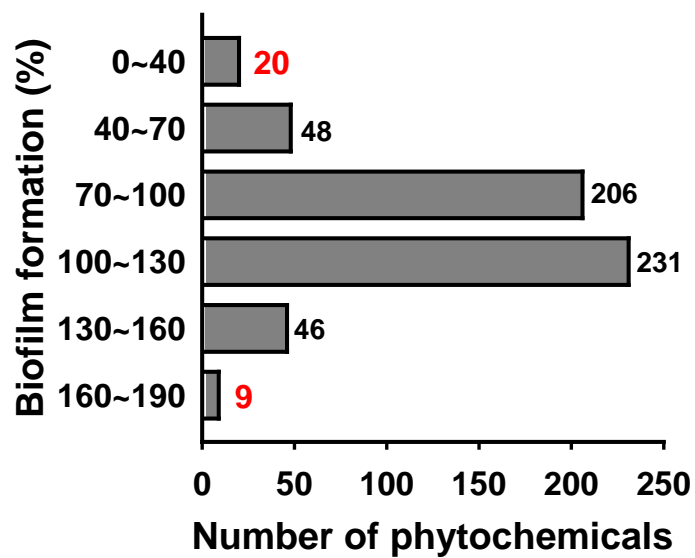

**Supplementary Figure S2.** Biofilm formation by *Escherichia coli* O157:H7 (a) or *Pseudomonas aeruginosa* PAO1 (b) in the presence of alizarin in LB medium after culture for 24 h. Two independent experiments were conducted (total 12 wells); error bars indicate standard deviations.

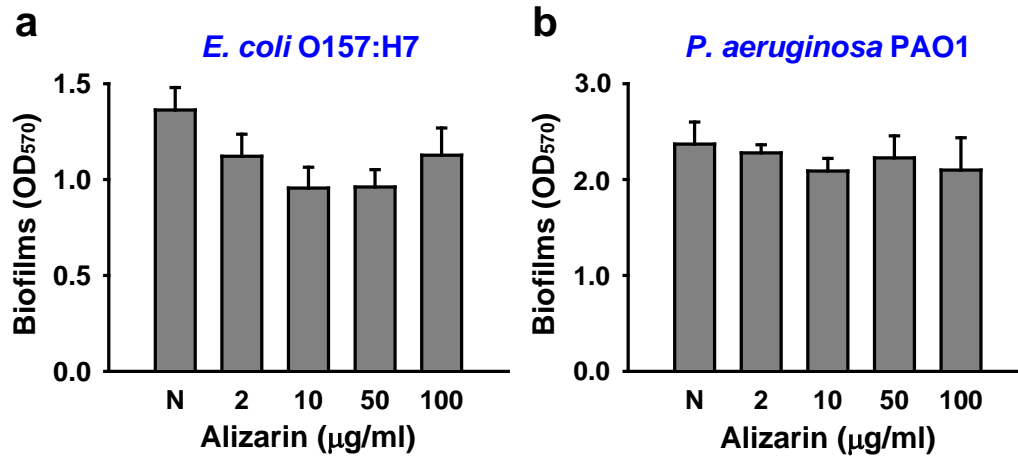

**Supplementary Figure S3.** Cell growth of *S. aureus* in the presence of alizarin. Planktonic cell growth of *S. aureus* MSSA 6538 was measured by counting CFUs in 250 ml-flasks agitated at 250 rpm.

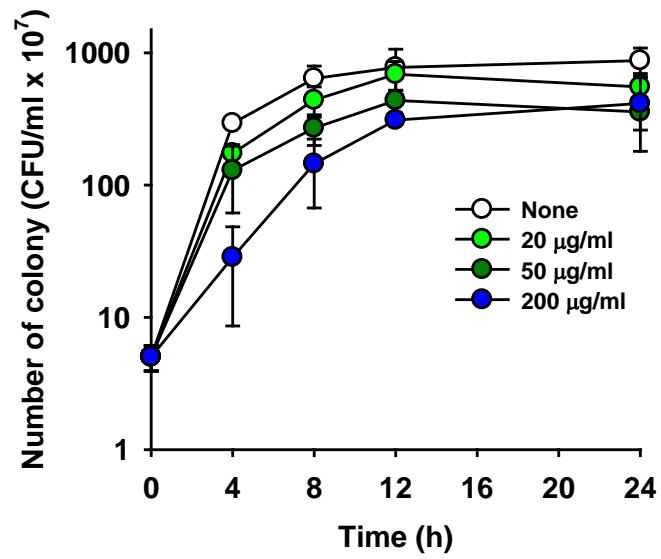

**Supplementary Figure S4.** Inhibitory effects of alizarin-related compounds on biofilm formation. Biofilm formations by MSSA 25923 (a) and MRSA MW2 (b) were quantified in the presence of the selected compounds at 0, 2, or 10  $\mu\text{g/ml}$  after incubation for 24 h in 96-well plates without shaking. At least two independent experiments were conducted (total 12 wells). Error bars indicate standard deviations. \*,  $P < 0.05$  versus non-treated controls.

**a MSSA 25923**

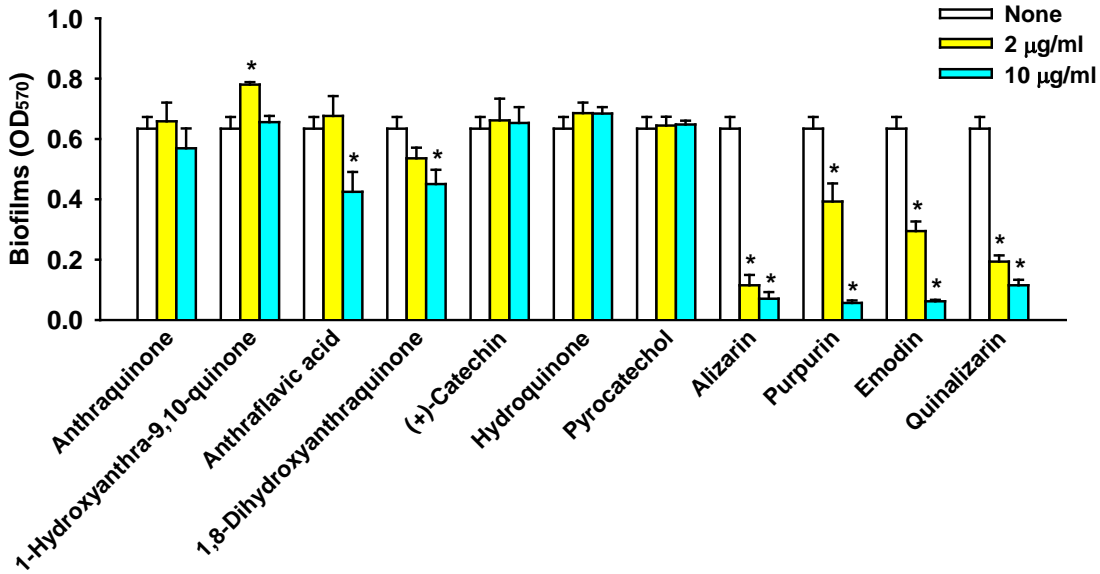

**b MRSA MW2**

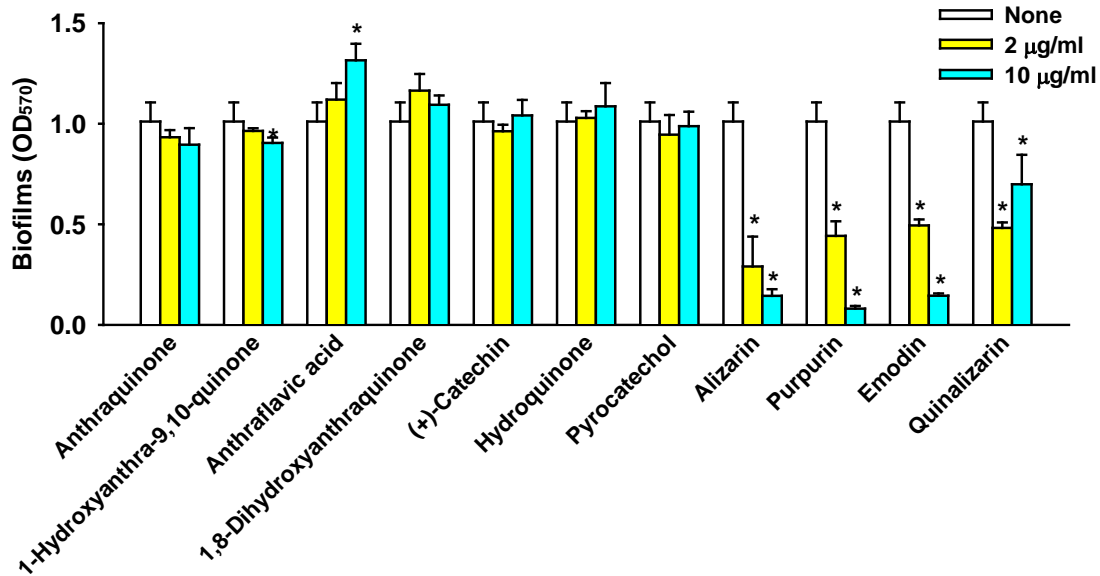

**Supplementary Table S1.** COMSTAT results for biofilm inhibition by alizarin against three *S. aureus* strains

| Strain        | Alizarin            | Volume/Area<br>( $\mu\text{m}^3 \mu\text{m}^{-2}$ ) | Mean<br>thickness ( $\mu\text{m}$ ) | Substratum<br>coverage (%) |
|---------------|---------------------|-----------------------------------------------------|-------------------------------------|----------------------------|
| MSSA<br>6538  | None                | 12 $\pm$ 1                                          | 11 $\pm$ 1                          | 99 $\pm$ 1                 |
|               | 2 $\mu\text{g/ml}$  | 7.3 $\pm$ 0.9                                       | 6.7 $\pm$ 0.7                       | 84 $\pm$ 9                 |
|               | 10 $\mu\text{g/ml}$ | 0.9 $\pm$ 0.2                                       | 0.7 $\pm$ 0.1                       | 32 $\pm$ 9                 |
| MSSA<br>25923 | None                | 4.0 $\pm$ 0.5                                       | 3.8 $\pm$ 0.6                       | 88 $\pm$ 10                |
|               | 2 $\mu\text{g/ml}$  | 2.5 $\pm$ 0.3                                       | 2.7 $\pm$ 0.3                       | 66 $\pm$ 4                 |
|               | 10 $\mu\text{g/ml}$ | 0.8 $\pm$ 0.3                                       | 0.9 $\pm$ 0.3                       | 24 $\pm$ 9                 |
| MRSA<br>MW2   | None                | 5.5 $\pm$ 0.6                                       | 5.8 $\pm$ 0.9                       | 91 $\pm$ 7                 |
|               | 2 $\mu\text{g/ml}$  | 1.7 $\pm$ 0.3                                       | 2.8 $\pm$ 0.5                       | 35 $\pm$ 5                 |
|               | 10 $\mu\text{g/ml}$ | 1.6 $\pm$ 0.2                                       | 1.9 $\pm$ 0.2                       | 37 $\pm$ 7                 |

**Supplementary Table S2.** Cell counting in the biofilms affected by alizarin. Biofilms were produced in 96-well polystyrene plates over 24 h with or without alizarin (0, 2, 10, or 100  $\mu\text{g/ml}$ ) and then washed three times with PBS. Biofilms were then resuspended in 300  $\mu\text{l}$  PBS, disrupted by pipetting vigorously for 60 sec and vortexing for 30 sec, and CFUs were measured. Three independent experiments were conducted.

| Strains               | None                          | Alizarin<br>2 $\mu\text{g/ml}$ | Alizarin<br>10 $\mu\text{g/ml}$ | Alizarin<br>100 $\mu\text{g/ml}$ |
|-----------------------|-------------------------------|--------------------------------|---------------------------------|----------------------------------|
| MSSA 6538             | $159 \pm 10$<br>$\times 10^6$ | $86 \pm 13$<br>$\times 10^6$   | $21 \pm 2$<br>$\times 10^6$     | N/A                              |
| MSSA 25923            | $167 \pm 11$<br>$\times 10^6$ | $102 \pm 15$<br>$\times 10^6$  | $49 \pm 5$<br>$\times 10^6$     | N/A                              |
| MRSA MW2              | $41 \pm 6$<br>$\times 10^6$   | $10 \pm 4$<br>$\times 10^6$    | $4 \pm 1$<br>$\times 10^6$      | N/A                              |
| <i>S. epidermidis</i> | $40 \pm 6$<br>$\times 10^6$   | N/A                            | $12 \pm 2$<br>$\times 10^6$     | $5 \pm 1$<br>$\times 10^6$       |

**Supplementary Table S3.** Sequences of the primers used for quantitative RT-PCR.

| Gene            | Name                              | Primer                                                                                         |
|-----------------|-----------------------------------|------------------------------------------------------------------------------------------------|
| <i>16S rRNA</i> | A component of ribosomes          | Forward 5'-TGT TTG ACG ATG TTT GAG CA-3'<br>Reverse 5'-CCT TCC TCC AGT TCA GAT GC -3'          |
| <i>agrA</i>     | Quorum-sensing regulator A        | Forward 5'-TGA TAA TCC TTA TGA GGT GCT T-3'<br>Reverse 5'-CAC TGT GAC TCG TAA CGA AAA-3'       |
| <i>aur</i>      | Zinc metalloproteinase aureolysin | Forward 5'-ACC GTG TGT TAA TTC GTG TGC TA-3'<br>Reverse 5'-ATG GTC GCA CAT TCA CAA GTT T-3'    |
| <i>cidA</i>     | Holin-like protein                | Forward 5'-AGC GTA ATT TCG GAA GCA ACA TCC-3'<br>Reverse 5'-TAC CGC TAA CTT GGG TAG AAG ACG-3' |
| <i>cidB</i>     | Holin-like protein                | Forward 5'-TGT TTT TGT TGA CTG TCG TT-3'<br>Reverse 5'-TCA TGT GAC ACT TCG ATA CC-3'           |
| <i>cidR</i>     | LysR-type regulator               | Forward 5'-TGG TGC ATT CCA TCA ACA AT-3'<br>Reverse 5'-ATT TTG CGA GTC GAT GCT CT-3'           |
| <i>clfB</i>     | Clumping factor B                 | Forward 5'-TGC AAG ATC AAA CTG TTC CT-3'<br>Reverse 5'-TCG GTC TGT AAA TAA AGG TA-3'           |
| <i>clp9</i>     | Serine protease                   | Forward 5'-CAG GTA CCA TCA CTT CAT C-3'<br>Reverse 5'-GGT TCA CAA ATT GAT GAC AAC G-3'         |
| <i>coa</i>      | Coagulase                         | Forward 5'-CAC GGA AAT GGC CAA GTA TC-3'<br>Reverse 5'-TCG GAC GAG CTC CAT ATG AT-3'           |
| <i>hla</i>      | $\alpha$ -Hemolysin               | Forward 5'-CGG CAC ATT TGC ACC AAT AAG GC-3'<br>Reverse 5'-GGT TTA GCC TGG CCT TCA GC-3'       |
| <i>icaA</i>     | Intercellular adhesion A          | Forward 5'-TGA ACC GCT TGC CAT GTG-3'<br>Reverse 5'-CAC GCG TTG CTT CCA AAG A-3'               |
| <i>icaD</i>     | Intercellular adhesion D          | Forward 5'-ACC CAA CGC TAA AAT CAT CG-3'<br>Reverse 5'-GCG AAA ATG CCC ATA GTT TC-3'           |
| <i>icaR</i>     | Intercellular locus regulator     | Forward 5'-TCG AAC TAT TCA ATT GAT GCT TTA-3'<br>Reverse 5'-CAG AAA ATT CCT CAG GCG TA-3'      |
| <i>isaA</i>     | Transglycosylase                  | Forward 5'-GCT CAA ATC ATG GCT CAA CGT-3'<br>Reverse 5'-TTG ATT CAC GAG CGA TGA TTG-3'         |
| <i>lrgA</i>     | Anti-hollin-like                  | Forward 5'-TGA AAC AAC AAA AAG ACG CAT CAA AAC CAG-3'                                          |



|             |                                  |                                                                                                           |
|-------------|----------------------------------|-----------------------------------------------------------------------------------------------------------|
|             | protein                          | Reverse 5'-ACT TCG CCT AAC TTA ACA GCA CCA G-3'                                                           |
| <i>lrgB</i> | Anti-hollin-like protein         | Forward 5'-TCG GAG GTA TTG GTA TCG-3'<br>Reverse 5'-CTG CTT GAG GTA ACA TTG A-3'                          |
| <i>nuc1</i> | Nuclease                         | Forward 5'-CAC CTG AAA CAA AGC ATC CTA A-3'<br>Reverse 5'-TAT ACG CTA AGC CAC GTC CAT-3'                  |
| <i>nuc2</i> | Nuclease                         | Forward 5'-ATG GAC GTG GCT TAG CGT AT-3'<br>Reverse 5'-TGA CCT GAA TCA GCG TTG TC-3'                      |
| <i>psma</i> | Phenol soluble modulins $\alpha$ | Forward 5'-ACC CAT GTG AAA GAC CTC CTT TGT-3'<br>Reverse 5'-ATG GGT ATC ATC GCT GGC ATC-3'                |
| <i>rbf</i>  | Regulator of biofilm formation   | Forward 5'-TTA GAA GGA ATC TTT AAA ACC TTA TTG AAT AA-3'<br>Reverse 5'-TTG TGA ATT TTT CTT CTT CGG ACA-3' |
| <i>sarA</i> | Transcriptional regulator        | Forward 5'-GAG TTG TTA TCA ATG GTC-3'<br>Reverse 5'-GTT TGC TTC AGT GAT TCG-3'                            |
| <i>sigB</i> | RNA Polymerase sigma factor      | Forward 5'-AAG TGA TTC GTA AGG ACG TCT-3'<br>Reverse 5'-TCG ATA ACT ATA ACC AAA GCC T-3'                  |
| <i>spa</i>  | Protein A                        | Forward 5'-ACC AGA AAC TGG TGA AGA AAA TCC-3'<br>Reverse 5'-TAA CGC TGC ACC TAA GGC TAA TG-3'             |
